# Supplementary material for: All slot-die coated organic solar cells using an amine processed cathode interlayer based upon an amino acid functionalised perylene bisimide
Source: Royal Society of Chemistry journal article supplement (doi:10.1039/d3lf00183k), 2023-12-05
Supplement: d3lf00183k1.pdf [file d3lf00183k1.pdf]

## Supporting Information

### 1. Experimental Methods

**Materials.** **PBI-Y** was synthesized as previously reported.<sup>1,2</sup> Perylene-3,4,9,10-tetracarboxylic dianhydride (PTCDA), L-tyrosine, butylamine, *o*-Xylene (reagent grade,  $\geq 98\%$ ), Triton-X100 and imidazole were purchased from Sigma-Aldrich. Indium tin oxide (ITO)-coated glass substrates were purchased from Zhuhai Kaivo Optoelectronic Technology Co., LTD ( $R_s \leq 10 \Omega/\square$   $T_r \geq 83\%$ ). PM6 and Y6C12 were received from Brilliant Matters. SnO<sub>2</sub> was purchased from Alfa Aesar. All commercial reagents were used as received.

**Solution preparation.** **PBI-Y** solutions were prepared at a concentration of 0.5 mg/mL. For butylamine solutions, the solutions were left to mix for 1 hour. For NaOH solutions, the **PBI-Y** was dissolved in distilled water and 1 molar equivalent of sodium hydroxide (0.1 M, aqueous). The solutions were stirred overnight until all the gelator had dissolved. SnO<sub>2</sub> nanoparticle solution (15% in H<sub>2</sub>O colloidal dispersion) was diluted with deionized water and ethanol in a volumetric ratio of 1:2.5:1.5, and 1 v/v% of Triton X-100 was added. The solution was shaken for 20 minutes before filtering with 0.45  $\mu\text{m}$  poly(vinylidene difluoride) (PVDF) filters (Biomed Scientific). Solutions of PM6 and Y6C12 were prepared in *o*-xylene at concentrations of 14.6 and 17.4 mg/mL, respectively. These solutions were heated at 50°C for 16 hours before mixing in 1:1 v/v ratios (1:1.2 w/w). Blend bulk heterojunction solutions were shaken for 10 minutes prior to spin- or slot-die coating.

**Fabrication of solar cells.** For spin-coated and slot-die coated solar cells, ITO-coated glass was cleaned by submerging in detergent and deionized water, acetone, and isopropanol, respectively, with ultrasonification for 15 minutes in each solvent. The substrates were then dried over a stream of compressed air before being treated with O<sub>2</sub> plasma (Ossila UV Ozone Cleaner) for 15 minutes.

For spin-coated devices, the SnO<sub>2</sub> precursor solution was spin-coated at 4000 rpm for 30 seconds in air and at room temperature, before being annealed after casting at 200°C in air for 30 minutes. **PBI-Y** was then spin-coated on top at 4000 rpm for 30 seconds in air and at room temperature. The substrates were then annealed after casting at 100°C in air for 10 minutes. The PM6/Y6C12 was spin-coated at 1000 rpm in air and at room temperature for 30 seconds and annealed after casting in air at 100°C for 10 minutes. Molybdenum trioxide was then deposited by thermal evaporation ( $\sim 3 \times 10^{-6}$  mbar) before deposition of the silver electrodes by thermal evaporation ( $\sim 3 \times 10^{-6}$  mbar) using a shadow mask, forming 0.14 cm<sup>2</sup> active area devices.

For slot-die coated devices, a FOM Technologies shear coater equipped with a 13 mm wide shim was used. The substrate to die head distance was 0.1 mm gap for all layers. For SnO<sub>2</sub>, the ITO substrates were kept on the bed of the slot-die coater heated at 50°C, with a coating speed of 20 cm/min and a pump rate of 10 μL/min. The substrates were then annealed after casting at 200°C in air for 30 minutes. **PBI-Y** was slot-die coated with a coating speed of 50 cm/min and a syringe flow of 100 μL/min. The temperature of the bed of the slot-die coater was 30°C. The substrates were annealed after casting at 100°C in air for 10 minutes. The PM6/Y6C12 blend was coated at a coating speed of 100 cm/min and a flow rate of 20 μL/min. The temperature of the slot-die coater head was 40°C and the bed was kept at 50°C, as previously reported.<sup>3</sup> The substrates were annealed after casting at 100°C for 10 minutes. To complete the OPV devices, silver and MoO<sub>x</sub> were thermally deposited using a shadow mask with 10 cm cut-outs for large substrates, forming 0.12 cm<sup>2</sup> active area devices.

**Characterization.** Optical absorption spectra were recorded using a UV-vis spectrometer (Agilent Technologies Cary 60) at room temperature. The film thickness was estimated by employing an Alpha-Step D-500 stylus profiler (KLA Instruments). Current density-voltage (*J-V*) measurements were performed in inert conditions using a Keithley 2400 source measure unit at AM 1.5G simulated solar light (Newport, Model 92251A-1000) with an irradiation intensity of 100 mW cm<sup>-2</sup>, which was measured by a calibrated silicon solar cell and a readout meter (Newport, Model 91150V). Atomic force microscopy (AFM) measurements were performed by using a TT-2 AFM (AFM Workshop, USA) in the tapping mode and WSxM software with a 0.01-0.024 Ohm/cm Sb (n) doped Si probe with a reflective back side aluminum coating.

## 2. Supplementary Figures and Tables

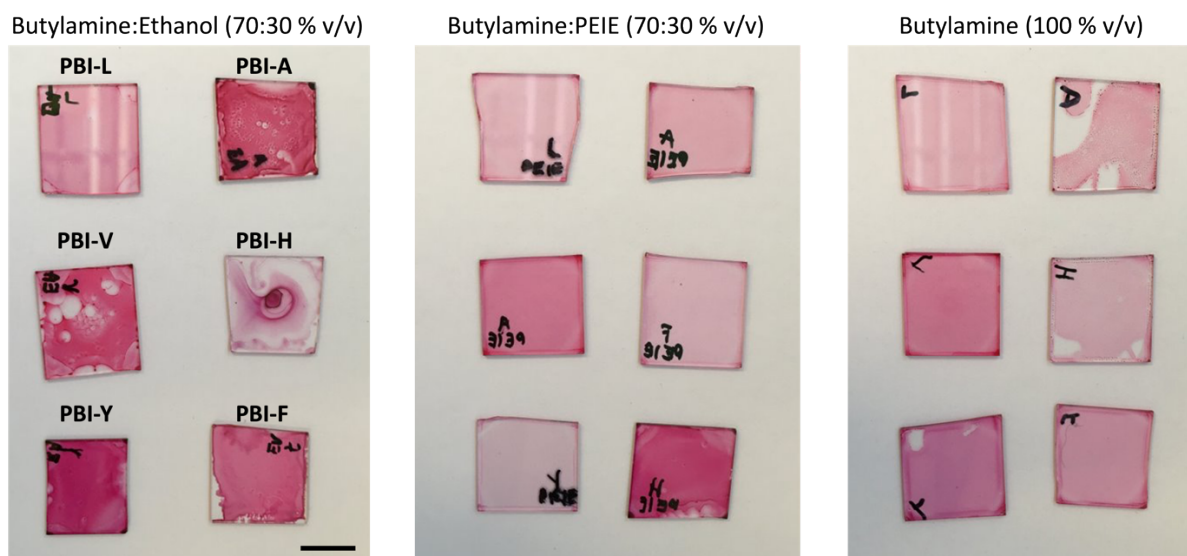

**Figure S1.** Screening of 6 amino acid functionalized PBIs prepared at a concentration of 0.5 mg/mL in different butylamine-based solvent systems. All films were spin-coated onto plasma-cleaned glass in air and at room temperature. Scale bar represents 1 cm.

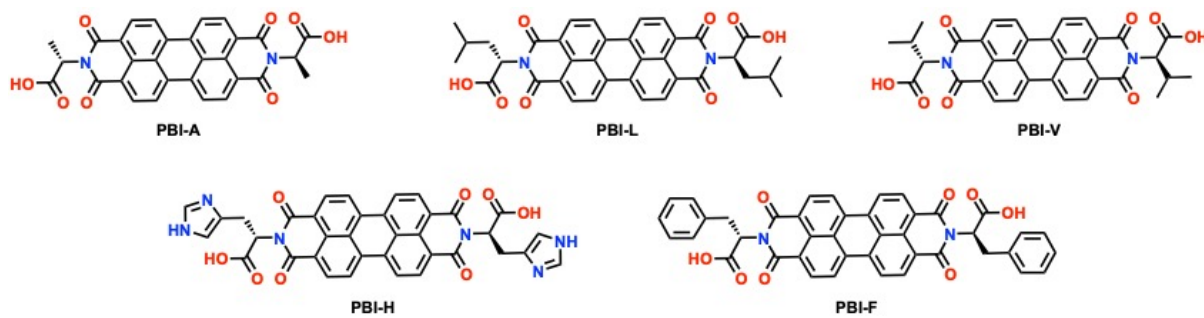

**Figure S2.** Chemical structures of PBI-A, PBI-L, PBI-V, PBI-H and PBI-F.

**Table S1.** Summary of photovoltaic device metrics of the spin-coated devices made using **PBI-Y** dissolved in a butylamine:ethanol mixture (70:30 %v/v).<sup>a,b</sup>

| Cathode Interlayer              | $V_{oc}$<br>[V]     | $J_{sc}$<br>[mA cm <sup>-2</sup> ] | FF<br>[%]         | PCE<br>[%]        |
|---------------------------------|---------------------|------------------------------------|-------------------|-------------------|
| SnO <sub>2</sub>                | 0.82 ± 0.003 (0.82) | 23.84 ± 0.05 (23.90)               | 69.2 ± 0.2 (70.2) | 13.6 ± 0.1 (13.7) |
| SnO <sub>2</sub> / <b>PBI-Y</b> | 0.78 ± 0.002 (0.78) | 24.40 ± 0.2 (24.50)                | 54.0 ± 0.3 (54.5) | 10.3 ± 0.1 (10.4) |

<sup>a</sup> Values reported are average of 10 best devices

<sup>b</sup> ± Standard deviation. Champion devices performance in parentheses.

**Table S2.** Summary of photovoltaic device metrics of the spin-coated devices made using **PBI-Y** dissolved in a butylamine:PEIE mixture (70:30 %v/v).<sup>a,b</sup>

| Cathode Interlayer              | $V_{oc}$<br>[V]     | $J_{sc}$<br>[mA cm <sup>-2</sup> ] | FF<br>[%]         | PCE<br>[%]         |
|---------------------------------|---------------------|------------------------------------|-------------------|--------------------|
| SnO <sub>2</sub>                | 0.79 ± 0.002 (0.79) | 19.41 ± 0.2 (19.62)                | 66.5 ± 0.7 (68.1) | 10.2 ± 0.04 (10.3) |
| SnO <sub>2</sub> / <b>PBI-Y</b> | 0.79 ± 0.006 (0.80) | 20.50 ± 0.4 (21.12)                | 64.3 ± 0.2 (65.7) | 10.7 ± 0.3 (10.4)  |

<sup>a</sup> Values reported are average of 10 best devices

<sup>b</sup> ± Standard deviation. Champion devices performance in parentheses.

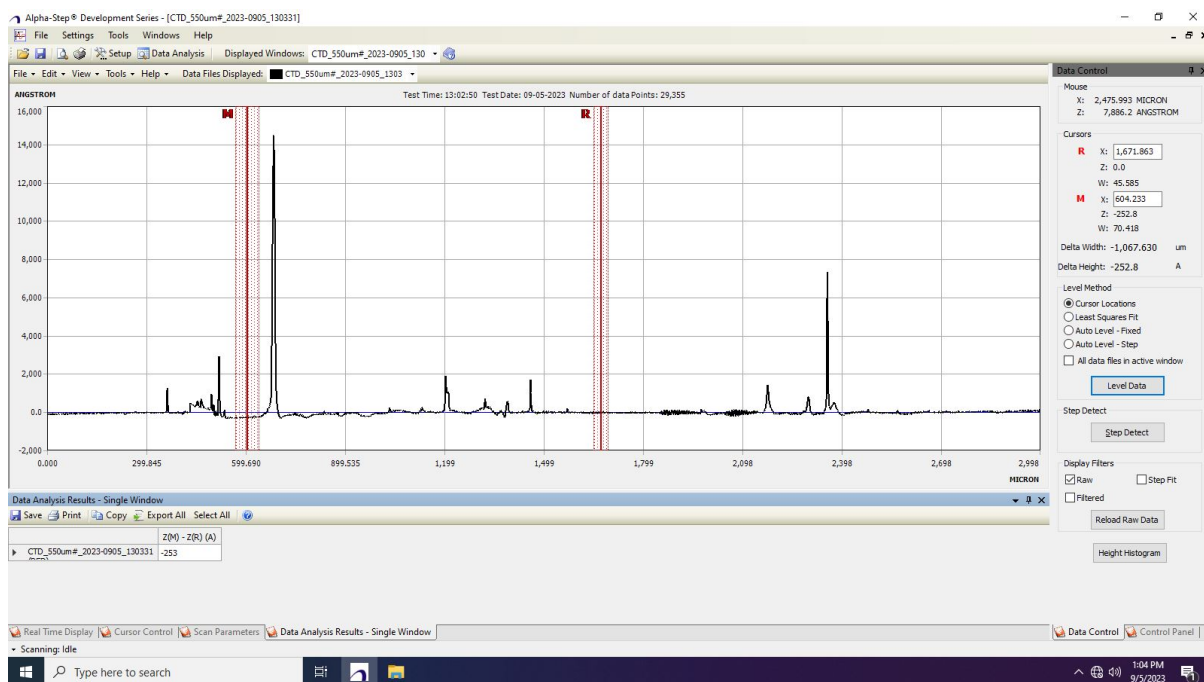

**Figure S3.** Thickness measurements by profilometer for glass/SnO<sub>2</sub>/PBI-Y films (spin-coated). Films were cast at a concentration of 5 mg/mL in air and at room temperature.

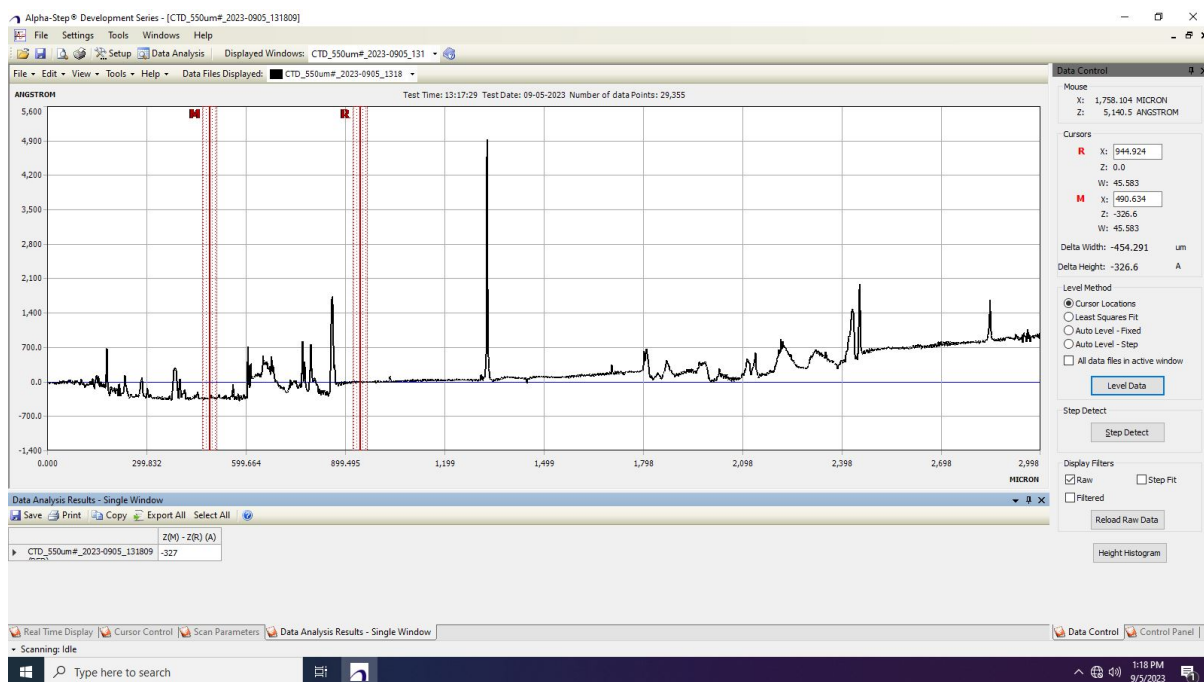

**Figure S4.** Thickness measurements by profilometer for glass/SnO<sub>2</sub>/PBI-Y films (slot-die coated). Films were cast at a concentration of 5 mg/mL in air and at room temperature.

**Table S3.** Summary of photovoltaic device metrics of spin-coated devices made from **PBI-Y** deposited from a 3 mg/mL solution in butylamine.

| Cathode Interlayer              | $V_{oc}$<br>[V] | $J_{sc}$<br>[mA cm <sup>-2</sup> ] | FF<br>[%]   | PCE<br>[%] |
|---------------------------------|-----------------|------------------------------------|-------------|------------|
| SnO <sub>2</sub> / <b>PBI-Y</b> | 0.78 ± 0.001    | 21.52 ± 0.39                       | 62.8 ± 0.68 | 10.6 ± 0.2 |

**Table S4.** Summary of photovoltaic device metrics of the spin-coated devices.<sup>a,b</sup>

| Cathode Interlayer              | $V_{oc}$<br>[V]     | $J_{sc}$<br>[mA cm <sup>-2</sup> ] | FF<br>[%]         | PCE<br>[%]        |
|---------------------------------|---------------------|------------------------------------|-------------------|-------------------|
| SnO <sub>2</sub>                | 0.82 ± 0.003 (0.82) | 23.21 ± 0.6 (23.45)                | 63.2 ± 0.5 (65.2) | 12.4 ± 0.2 (12.5) |
| SnO <sub>2</sub> / <b>PBI-Y</b> | 0.80 ± 0.002 (0.80) | 23.72 ± 0.5 (24.47)                | 65.7 ± 0.3 (64.9) | 12.4 ± 0.2 (12.8) |

<sup>a</sup> Values reported are average of 10 best devices

<sup>b</sup> ± Standard deviation. Champion devices performance in parentheses.

**Table S5.** Summary of photovoltaic device metrics of the spin-coated devices using 0.1 M NaOH (aq) as the base.<sup>a,b</sup>

| Cathode Interlayer                     | $V_{oc}$<br>[V]     | $J_{sc}$<br>[mA cm <sup>-2</sup> ] | FF<br>[%]         | PCE<br>[%]         |
|----------------------------------------|---------------------|------------------------------------|-------------------|--------------------|
| SnO <sub>2</sub>                       | 0.82 ± 0.003 (0.82) | 23.21 ± 0.6 (23.45)                | 63.2 ± 0.5 (65.2) | 12.4 ± 0.2 (12.5)  |
| SnO <sub>2</sub> / <b>PBI-Y</b> (NaOH) | 0.77 ± 0.002 (0.77) | 23.12 ± 0.1 (23.27)                | 57.3 ± 0.2 (57.5) | 10.2 ± 0.07 (10.3) |

<sup>a</sup> Values reported are average of 10 best devices

<sup>b</sup> ± Standard deviation. Champion devices performance in parentheses.

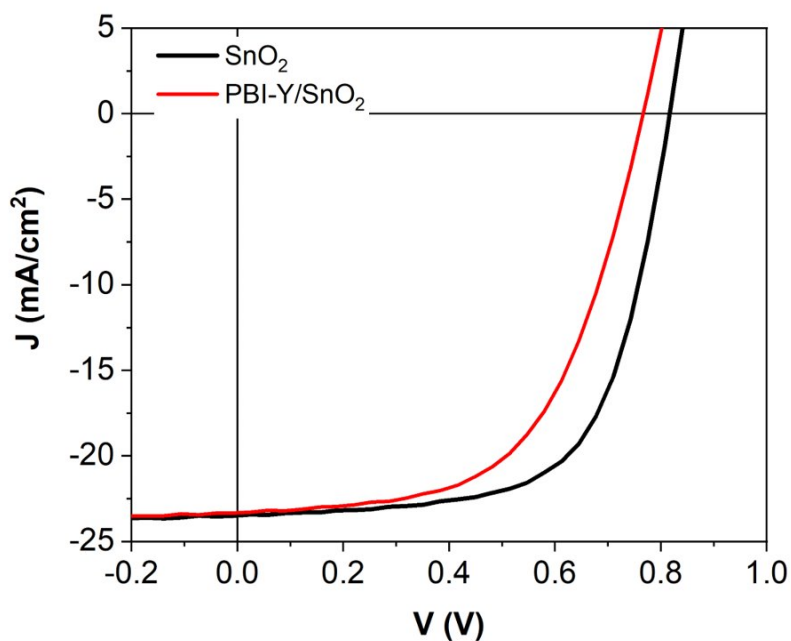

**Figure S5.**  $J$ - $V$  curves of slot-die coated  $\text{SnO}_2$ /**PBI-Y** devices using 0.1 M NaOH (aq) (red) compared to reference with  $\text{SnO}_2$  only.

**Table S6.** Summary of photovoltaic device metrics of the slot-die coated devices.<sup>a,b</sup>

| Cathode Interlayer            | $V_{oc}$<br>[V]         | $J_{sc}$<br>[mA cm <sup>-2</sup> ] | FF<br>[%]             | PCE<br>[%]            |
|-------------------------------|-------------------------|------------------------------------|-----------------------|-----------------------|
| $\text{SnO}_2$                | $0.80 \pm 0.004$ (0.80) | $22.11 \pm 0.4$ (22.45)            | $65.2 \pm 0.3$ (66.3) | $9.2 \pm 0.3$ (9.4)   |
| $\text{SnO}_2$ / <b>PBI-Y</b> | $0.78 \pm 0.005$ (0.78) | $22.3 \pm 0.3$ (22.8)              | $60.2 \pm 0.3$ (61.2) | $10.4 \pm 0.1$ (10.6) |

<sup>a</sup> Values reported are average of 10 best devices

<sup>b</sup>  $\pm$  Standard deviation. Champion devices performance in parentheses.

**Table S7.** Summary of photovoltaic device metrics of the spin-coated devices using **PBI-Y** alone as the electron transport layer.

| Cathode Interlayer | $V_{oc}$<br>[V] | $J_{sc}$<br>[mA cm <sup>-2</sup> ] | FF<br>[%] | PCE<br>[%] |
|--------------------|-----------------|------------------------------------|-----------|------------|
| <b>PBI-Y</b>       | 0.72            | 20.17                              | 25.44     | 3.69       |

## References

1. E. R. Draper, L. J. Archibald, M. C. Nolan, R. Schweins, M. A. Zwijnenburg, S. Sproules and D. J. Adams, *Chem. Eur. J.*, 2018, **24**, 4006–4010.
2. D. McDowall, B. J. Greeves, R. Clowes, K. McAulay, A. M. Fuentes-Caparrós, L. Thomson, N. Khunti, N. Cowieson, M. C. Nolan, M. Wallace, A. I. Cooper, E. R. Draper, A. J. Cowan and D. J. Adams, *Adv. Energy Mater.*, 2020, **10**, 2002469.
3. M. R. Niazi, H. Zhao, R. M. Lamarche, R. Munir, S. Trudel, J. Hu and G. C. Welch, *Adv. Mater. Interfaces*, 2022, **9**, 2201363.
